# Supplementary material
Source: MDPI journal article supplement (https://www.mdpi.com/2073-445X/11/9/1582)
Supplement: s1 [file s1]

# Coexistence of native and invasive freshwater turtles: the Llobregat Delta (NE Iberian Peninsula) as a case study

Marc Franch <sup>1,2,\*</sup>, Gustavo A. Llorente <sup>3</sup>, Maria Rieradevall <sup>4,†</sup>, Albert Montori <sup>5</sup>, Miguel Cañedo-Argüelles <sup>4,6</sup>

**Table S1.** Landscape metrics for three different diameter buffers and for each species (mean  $\pm$  SD). Buffer diameters are related to different movement types of the species: Ø100: Proximity movements; Ø500: Annual movements and Ø2000: Occasional movements. ML: *Mauremys leprosa* and TSE: *Trachemys scripta elegans*. In the main text refers to the name of the variable plus the corresponding buffer diameter (i.e. R(Ø100)).

|               | Ø100                  |                       | Ø500                  |                       | Ø2000                    |                          |
|---------------|-----------------------|-----------------------|-----------------------|-----------------------|--------------------------|--------------------------|
|               | ML                    | TSE                   | ML                    | TSE                   | ML                       | TSE                      |
| <b>R</b>      | 3.29 $\pm$ 0.77       | 3.23 $\pm$ 1.10       | 6.03 $\pm$ 1.01       | 6.28 $\pm$ 1.00       | 9.30 $\pm$ 0.86          | 9.29 $\pm$ 0.77          |
| <b>SDI</b>    | 0.83 $\pm$ 0.26       | 0.86 $\pm$ 0.36       | 1.27 $\pm$ 0.20       | 1.27 $\pm$ 0.29       | 1.72 $\pm$ 0.24          | 1.75 $\pm$ 0.23          |
| <b>SEI</b>    | 0.74 $\pm$ 0.17       | 0.76 $\pm$ 0.15       | 0.71 $\pm$ 0.08       | 0.70 $\pm$ 0.14       | 0.77 $\pm$ 0.09          | 0.78 $\pm$ 0.10          |
| <b>AWMSI</b>  | 1.34 $\pm$ 0.16       | 1.34 $\pm$ 0.15       | 1.94 $\pm$ 0.28       | 1.94 $\pm$ 0.35       | 2.85 $\pm$ 0.38          | 2.82 $\pm$ 0.37          |
| <b>MSI</b>    | 1.47 $\pm$ 0.16       | 1.41 $\pm$ 0.11       | 1.76 $\pm$ 0.09       | 1.75 $\pm$ 0.11       | 1.83 $\pm$ 0.07          | 1.85 $\pm$ 0.07          |
| <b>MPAR</b>   | 3475.63 $\pm$ 2603.75 | 2238.15 $\pm$ 1154.38 | 2237.93 $\pm$ 1641.94 | 2226.43 $\pm$ 2003.52 | 1471.47 $\pm$ 561.12     | 1511.64 $\pm$ 943.21     |
| <b>MPFD</b>   | 1.49 $\pm$ 0.08       | 1.46 $\pm$ 0.04       | 1.45 $\pm$ 0.02       | 1.44 $\pm$ 0.02       | 1.43 $\pm$ 0.00          | 1.43 $\pm$ 0.00          |
| <b>AWMPFD</b> | 1.39 $\pm$ 0.04       | 1.39 $\pm$ 0.03       | 1.37 $\pm$ 0.02       | 1.37 $\pm$ 0.03       | 1.39 $\pm$ 0.02          | 1.39 $\pm$ 0.02          |
| <b>TE</b>     | 783.18 $\pm$ 189.42   | 785.78 $\pm$ 189.52   | 9825.81 $\pm$ 1903.69 | 9806.71 $\pm$ 2376.17 | 115122.86 $\pm$ 17202.50 | 109152.89 $\pm$ 15366.04 |
| <b>ED</b>     | 999.81 $\pm$ 241.81   | 1008.42 $\pm$ 236.23  | 503.77 $\pm$ 96.42    | 510.68 $\pm$ 125.89   | 405.65 $\pm$ 49.39       | 403.06 $\pm$ 54.01       |
| <b>MPE</b>    | 201.30 $\pm$ 44.46    | 207.53 $\pm$ 34.56    | 570.11 $\pm$ 96.98    | 561.35 $\pm$ 83.24    | 786.61 $\pm$ 114.49      | 811.25 $\pm$ 109.76      |
| <b>PSCoV</b>  | 74.10 $\pm$ 36.31     | 64.88 $\pm$ 14.69     | 152.31 $\pm$ 42.32    | 156.44 $\pm$ 46.76    | 312.55 $\pm$ 119.90      | 294.64 $\pm$ 116.80      |
| <b>NumP</b>   | 4.25 $\pm$ 1.41       | 4.08 $\pm$ 1.49       | 18.26 $\pm$ 5.44      | 18.24 $\pm$ 5.61      | 152.65 $\pm$ 44.59       | 140.09 $\pm$ 44.09       |
| <b>MPS</b>    | 0.22 $\pm$ 0.09       | 0.23 $\pm$ 0.09       | 1.20 $\pm$ 0.34       | 1.19 $\pm$ 0.37       | 1.98 $\pm$ 0.42          | 2.06 $\pm$ 0.44          |
| <b>MedPS</b>  | 0.19 $\pm$ 0.11       | 0.21 $\pm$ 0.10       | 0.43 $\pm$ 0.14       | 0.47 $\pm$ 0.21       | 0.35 $\pm$ 0.06          | 0.36 $\pm$ 0.06          |
| <b>PSSD</b>   | 0.13 $\pm$ 0.06       | 0.13 $\pm$ 0.04       | 1.78 $\pm$ 0.49       | 1.79 $\pm$ 0.53       | 5.91 $\pm$ 1.32          | 5.79 $\pm$ 1.31          |
| <b>TLA</b>    | 0.78 $\pm$ 0.00       | 0.78 $\pm$ 0.01       | 19.52 $\pm$ 0.27      | 19.28 $\pm$ 1.30      | 283.78 $\pm$ 25.57       | 272.77 $\pm$ 34.92       |
| <b>CA</b>     | 0.78 $\pm$ 0.00       | 0.78 $\pm$ 0.01       | 19.52 $\pm$ 0.27      | 19.28 $\pm$ 1.30      | 283.78 $\pm$ 25.57       | 272.77 $\pm$ 34.92       |

**Table S2.** Mean values and standard deviations of the environmental variables for each sampling station (mean  $\pm$  SD). Typology: IC: Irrigation channel; E: Estuary; L: Lagoon and P: Pond.

| Station Code | Typology | Secchi (m)        | pH              | Ox (mg)           | Ox (%)              | T (°C)            | NO <sup>2-</sup>        | NO <sup>3-</sup>      | NH <sub>4</sub> <sup>+</sup> |
|--------------|----------|-------------------|-----------------|-------------------|---------------------|-------------------|-------------------------|-----------------------|------------------------------|
| EB5          | IC       | 0.52 $\pm$ 0.25   | 8.47 $\pm$ 0.84 | 16.59 $\pm$ 2.49  | 194.90 $\pm$ 54.05  | 23.42 $\pm$ 8.77  |                         | 1.02 $\pm$ 0.87       | 0.10 $\pm$ 0.09              |
| EC5          | IC       |                   | 7.61 $\pm$ 0.41 | 7.93 $\pm$ 6.55   | 90.25 $\pm$ 74.63   | 22.65 $\pm$ 5.79  | 0.32 $\pm$ 0.07         | 7.82 $\pm$ 3.87       | 0.14 $\pm$ 0.12              |
| EC4          | IC       |                   | 7.06 $\pm$ 0.60 | 3.66 $\pm$ 3.14   | 41.67 $\pm$ 33.04   | 22.72 $\pm$ 2.57  |                         | 0.38 $\pm$ 0.27       | 1.78 $\pm$ 2.09              |
| LL1          | E        | 1.16 $\pm$ 0.65   | 8.02 $\pm$ 0.24 | 10.43 $\pm$ 6.41  | 121.48 $\pm$ 78.09  | 20.26 $\pm$ 5.49  | 0.43 $\pm$ 0.31         | 6.12 $\pm$ 4.88       | 4.83 $\pm$ 4.15              |
| LL2          | E        | 0.78 $\pm$ 0.52   | 7.89 $\pm$ 0.16 | 6.47 $\pm$ 1.80   | 70.66 $\pm$ 20.29   | 19.78 $\pm$ 5.41  | 0.47 $\pm$ 0.26         | 5.58 $\pm$ 4.46       | 6.87 $\pm$ 4.77              |
| CT           | L        | 1.34 $\pm$ 0.20   | 8.92 $\pm$ 0.13 | 8.92 $\pm$ 1.14   | 96.96 $\pm$ 14.05   | 19.21 $\pm$ 4.26  | 0.03 $\pm$ 0.01         | 1.27 $\pm$ 1.29       | 0.06 $\pm$ 0.04              |
| EB10         | L        | 0.88 $\pm$ 0.41   | 8.33 $\pm$ 0.35 | 10.01 $\pm$ 11.58 | 107.25 $\pm$ 116.96 | 22.37 $\pm$ 6.49  | 1.17 $\pm$ 1.16         | 4.07 $\pm$ 6.29       | 37.82 $\pm$ 10.94            |
| RE           | L        | 0.60 $\pm$ 0.11   | 8.20 $\pm$ 0.15 | 12.41 $\pm$ 3.36  | 132.85 $\pm$ 43.56  | 18.82 $\pm$ 4.54  | 1.06 $\pm$ 0.32         | 5.72 $\pm$ 2.21       | 10.64 $\pm$ 5.53             |
| RI           | L        | 0.70 $\pm$ 0.13   | 8.28 $\pm$ 0.07 | 10.82 $\pm$ 1.83  | 116.82 $\pm$ 21.74  | 19.84 $\pm$ 4.79  | 0.02 $\pm$ 0.01         | 2.25 $\pm$ 1.39       | 0.05 $\pm$ 0.02              |
| EB6          | L        | 0.55 $\pm$ 0.14   | 8.65 $\pm$ 0.29 | 13.07 $\pm$ 6.34  | 137.32 $\pm$ 68.98  | 23.10 $\pm$ 7.62  | 0.25 $\pm$ 0.33         | 5.82 $\pm$ 8.77       | 0.86 $\pm$ 1.72              |
| CA           | L        | 1.36 $\pm$ 0.44   | 8.29 $\pm$ 0.13 | 8.83 $\pm$ 1.51   | 93.90 $\pm$ 12.52   | 19.57 $\pm$ 4.07  | 0.06 $\pm$ 0.03         | 1.78 $\pm$ 0.94       | 0.07 $\pm$ 0.03              |
| EB7          | P        | 1.68 $\pm$ 1.30   | 8.48 $\pm$ 0.21 | 12.02 $\pm$ 5.21  | 133.90 $\pm$ 41.12  | 22.32 $\pm$ 6.13  | 0.03 $\pm$ 0.03         | 0.67 $\pm$ 0.28       | 0.14 $\pm$ 0.13              |
| EB4          | P        |                   | 8.39 $\pm$ 0.53 | 8.97 $\pm$ 5.21   | 98.87 $\pm$ 50.73   | 23.15 $\pm$ 6.23  | 0.04 $\pm$ 0.03         | 0.55 $\pm$ 0.26       | 0.12 $\pm$ 0.11              |
|              |          | DIN               | Chla-a          | SRP               | SSP                 | TOC               | Cond ( $\mu$ S/cm)      | Cl <sup>-</sup>       | Na <sup>+</sup>              |
| EB5          | IC       | 1.15 $\pm$ 0.78   | 0.22 $\pm$ 0.13 | 1.89 $\pm$ 2.78   | 0.13 $\pm$ 0.02     | 46.42 $\pm$ 20.03 | 15462.50 $\pm$ 2379.98  | 4236.33 $\pm$ 2574.14 | 1682.96 $\pm$ 1022.62        |
| EC5          | IC       | 8.29 $\pm$ 3.83   |                 | 0.64 $\pm$ 0.59   | 0.11 $\pm$ 0.07     | 8.36 $\pm$ 3.74   | 1874.25 $\pm$ 861.43    | 311.15 $\pm$ 128.69   | 170.40 $\pm$ 50.70           |
| EC4          | IC       | 2.19 $\pm$ 2.30   |                 | 2.27 $\pm$ 2.45   | 0.08 $\pm$ 0.04     | 12.50 $\pm$ 7.35  | 1583.00 $\pm$ 301.22    | 244.67 $\pm$ 134.89   | 132.76 $\pm$ 85.95           |
| LL1          | E        |                   |                 | 0.53 $\pm$ 0.28   | 0.13 $\pm$ 0.06     | 5.35 $\pm$ 1.40   | 23372.14 $\pm$ 11371.52 | 5544.37 $\pm$ 3955.66 | 3183.06 $\pm$ 1791.11        |
| LL2          | E        |                   |                 | 0.72 $\pm$ 0.45   | 0.25 $\pm$ 0.14     | 7.37 $\pm$ 2.63   | 18814.28 $\pm$ 10168.50 | 4536.97 $\pm$ 2574.94 | 3305.23 $\pm$ 1996.05        |
| CT           | L        | 1.36 $\pm$ 1.29   | 0.01 $\pm$ 0.01 | 0.02 $\pm$ 0.01   | 0.06 $\pm$ 0.01     | 11.31 $\pm$ 2.09  | 6751.53 $\pm$ 775.56    | 2859.83 $\pm$ 567.41  | 1014.41 $\pm$ 201.49         |
| EB10         | L        | 43.07 $\pm$ 14.35 | 0.06 $\pm$ 0.09 | 6.59 $\pm$ 2.24   | 0.13 $\pm$ 0.10     | 15.04 $\pm$ 2.44  | 2765.50 $\pm$ 493.99    | 589.28 $\pm$ 117.48   | 315.07 $\pm$ 51.79           |
| RE           | L        | 17.43 $\pm$ 5.77  | 0.14 $\pm$ 0.05 | 3.22 $\pm$ 1.87   | 0.14 $\pm$ 0.06     | 12.40 $\pm$ 2.15  | 4988.41 $\pm$ 1311.49   | 2090.19 $\pm$ 811.37  | 912.79 $\pm$ 390.28          |
| RI           | L        | 2.33 $\pm$ 1.39   | 0.04 $\pm$ 0.01 | 1.34 $\pm$ 1.26   | 0.12 $\pm$ 0.03     | 15.98 $\pm$ 6.14  | 13284.28 $\pm$ 1361.08  | 6048.00 $\pm$ 640.83  | 2209.63 $\pm$ 494.32         |
| EB6          | L        | 6.93 $\pm$ 8.88   | 0.16 $\pm$ 0.15 | 2.28 $\pm$ 1.93   | 0.18 $\pm$ 0.11     | 17.66 $\pm$ 6.46  | 10210.50 $\pm$ 9304.17  | 2905.54 $\pm$ 1238.40 | 1132.71 $\pm$ 642.53         |
| CA           | L        | 1.91 $\pm$ 0.96   | 0.02 $\pm$ 0.01 | 0.07 $\pm$ 0.03   | 0.10 $\pm$ 0.02     | 10.31 $\pm$ 1.85  | 9729.77 $\pm$ 2872.60   | 4595.98 $\pm$ 1552.77 | 1501.56 $\pm$ 448.71         |
| EB7          | P        | 0.86 $\pm$ 0.36   | 0.04 $\pm$ 0.05 | 0.19 $\pm$ 0.11   | 0.14 $\pm$ 0.06     | 15.78 $\pm$ 1.19  | 4816.25 $\pm$ 652.91    | 1196.44 $\pm$ 930.85  | 762.66 $\pm$ 472.22          |
| EB4          | P        | 0.71 $\pm$ 0.26   | 0.13 $\pm$ 0.10 | 2.11 $\pm$ 3.18   | 0.13 $\pm$ 0.06     | 20.72 $\pm$ 6.78  | 2577.25 $\pm$ 1362.04   | 749.79 $\pm$ 231.81   | 387.23 $\pm$ 123.81          |

|             |           | SO <sub>4</sub> <sup>2-</sup> | Ca <sup>2+</sup> | Mg <sup>2+</sup> | Mn <sup>2+</sup> | K <sup>+</sup> | Fe <sup>2+</sup> | Si <sup>2+</sup> |
|-------------|-----------|-------------------------------|------------------|------------------|------------------|----------------|------------------|------------------|
| <b>EB5</b>  | <b>IC</b> | 430.46 ± 175.30               | 31.04 ± 12.75    | 206.00 ± 69.09   |                  | 95.62 ± 35.05  | 0.02 ± 0.01      | 2.01 ± 1.63      |
| <b>EC5</b>  | <b>IC</b> | 193.33 ± 20.58                | 78.36 ± 12.38    | 34.35 ± 3.45     | 0.04 ± 0.01      | 31.33 ± 5.50   |                  | 0.76 ± 0.69      |
| <b>EC4</b>  | <b>IC</b> | 129.61 ± 46.73                | 73.16 ± 14.21    | 28.06 ± 7.46     | 0.06 ± 0.03      | 27.40 ± 9.04   | 0.04 ± 0.02      | 2.47 ± 1.67      |
| <b>LL1</b>  | <b>E</b>  | 1574.49 ± 1009.54             | 129.52 ± 37.04   | 286.46 ± 152.58  | 0.03 ± 0.01      | 101.23 ± 49.92 | 0.02 ± 0.01      | 0.57 ± 0.22      |
| <b>LL2</b>  | <b>E</b>  | 1371.91 ± 818.61              | 146.63 ± 45.40   | 320.10 ± 189.03  | 0.11 ± 0.14      | 114.08 ± 63.93 | 0.03 ± 0.01      | 0.69 ± 0.19      |
| <b>CT</b>   | <b>L</b>  | 377.95 ± 54.59                | 37.65 ± 9.79     | 92.97 ± 29.30    | 0.03 ± 0.01      | 57.60 ± 16.48  | 0.08 ± 0.06      | 0.11 ± 0.02      |
| <b>EB10</b> | <b>L</b>  | 262.21 ± 43.85                | 85.19 ± 22.26    | 44.86 ± 2.66     | 0.03 ± 0.01      | 47.89 ± 7.05   | 0.04 ± 0.02      | 4.69 ± 1.31      |
| <b>RE</b>   | <b>L</b>  | 582.85 ± 347.67               | 92.34 ± 10.89    | 92.00 ± 24.29    | 0.05 ± 0.04      | 49.92 ± 8.04   | 0.02 ± 0.01      | 2.23 ± 1.23      |
| <b>RI</b>   | <b>L</b>  | 729.25 ± 64.01                | 170.44 ± 30.21   | 216.61 ± 32.91   | 0.02 ± 0.01      | 71.44 ± 10.88  |                  | 2.82 ± 0.48      |
| <b>EB6</b>  | <b>L</b>  | 564.83 ± 225.27               | 107.39 ± 21.97   | 161.14 ± 109.09  | 0.05 ± 0.07      | 68.65 ± 31.59  |                  | 2.99 ± 2.30      |
| <b>CA</b>   | <b>L</b>  | 628.35 ± 136.71               | 107.82 ± 11.99   | 136.57 ± 31.55   | 0.03 ± 0.01      | 57.63 ± 12.35  | 0.03 ± 0.01      | 0.63 ± 0.35      |
| <b>EB7</b>  | <b>P</b>  | 683.23 ± 89.39                | 60.28 ± 9.32     | 144.67 ± 23.27   | 0.02 ± 0.01      | 108.92 ± 19.79 |                  | 0.35 ± 0.13      |
| <b>EB4</b>  | <b>P</b>  | 214.05 ± 76.27                | 63.87 ± 29.38    | 50.46 ± 14.64    | 0.02 ± 0.01      | 39.78 ± 14.42  | 0.03 ± 0.01      | 0.70 ± 0.68      |
